RETRACTION

# Retraction: Eco-friendly soil amendments improve growth, antioxidant activities, and root colonization in lingrain (*Linum Usitatissimum* L.) under drought conditions

The PLOS ONE Editors

The PLOS ONE Editors retract this article [1] because it was identified as one of a series of submissions for which we have concerns about authorship, competing interests, and peer review. We regret that the issues were not addressed prior to the article's publication.

HH, RA, ATKZ, and RZS did not agree with the retraction. MF and AHG either did not respond directly or could not be reached.

## Reference

1. Fallah M, Hadi H, Amirnia R, Hassanzadeh-Ghortapeh A, Zuan ATK, Sayyed RZ (2021) Eco-friendly soil amendments improve growth, antioxidant activities, and root colonization in lingrain (*Linum Usitatissimum* L.) under drought conditions. PLoS ONE 16(12): e0261225. <https://doi.org/10.1371/journal.pone.0261225> PMID: 34941919

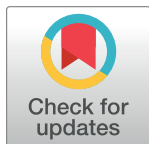

## OPEN ACCESS

**Citation:** The PLOS ONE Editors (2022) Retraction: Eco-friendly soil amendments improve growth, antioxidant activities, and root colonization in lingrain (*Linum Usitatissimum* L.) under drought conditions. PLoS ONE 17(8): e0272534. <https://doi.org/10.1371/journal.pone.0272534>

**Published:** August 17, 2022

**Copyright:** © 2022 The PLOS ONE Editors. This is an open access article distributed under the terms of the [Creative Commons Attribution License](https://creativecommons.org/licenses/by/4.0/), which permits unrestricted use, distribution, and reproduction in any medium, provided the original author and source are credited.
